# Supplementary material for: Changes in soil organic and inorganic carbon with elevation in a dry alpine rangeland of the northern Qinghai–Tibet Plateau
Source: Copernicus journal article supplement (doi:10.5194/bg-22-4123-2025), 2025-08-26
Supplement: Supplementary file 1 [file bg-22-4123-2025-supplement.zip]

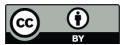

*Supplement of*

**Changes in soil organic and inorganic carbon with elevation in a dry alpine rangeland of the northern Qinghai–Tibet Plateau**

**Qinglin Liu et al.**

*Correspondence to:* Ailin Zhang (alzhang@hbu.edu.cn)

- [bg-22-4123-2025-supplement-title-page.pdf](#)
- [R\\_code.docx](#)
- [SICD.csv](#)
- [SOCD.csv](#)
- [Supplementary.docx](#)

The copyright of individual parts of the supplement might differ from the article licence.
