# Supplementary material for: Changes in soil organic and inorganic carbon with elevation in a dry alpine rangeland of the northern Qinghai–Tibet Plateau
Source: Copernicus journal article supplement (doi:10.5194/bg-22-4123-2025), 2025-08-26
Supplement: Supplementary file 1 [file bg-22-4123-2025-supplement.zip]

**The vertical distribution of soil organic and inorganic carbon in a dry alpine rangeland of northern Qinghai-Tibetan Plateau**

Qinglin Liu a, Ailin Zhang a*, Xiangyi Li b, Jinfei Yin a, Yuxue Zhang a, Osbert Jianxin Sun a,c, Yong Jiang a

a School of Life Sciences, Hebei University, Baoding, 071002, China

b Xinjiang Institute of Ecology and Geography, Chinese Academy of Sciences, Urumqi, 830011, China

c School of Ecology and Nature Conservation, Beijing Forestry University, Beijing, 100083, China

* Corresponding authors.

E-mail address: alzhang@hbu.edu.cn (Ailin Zhang).


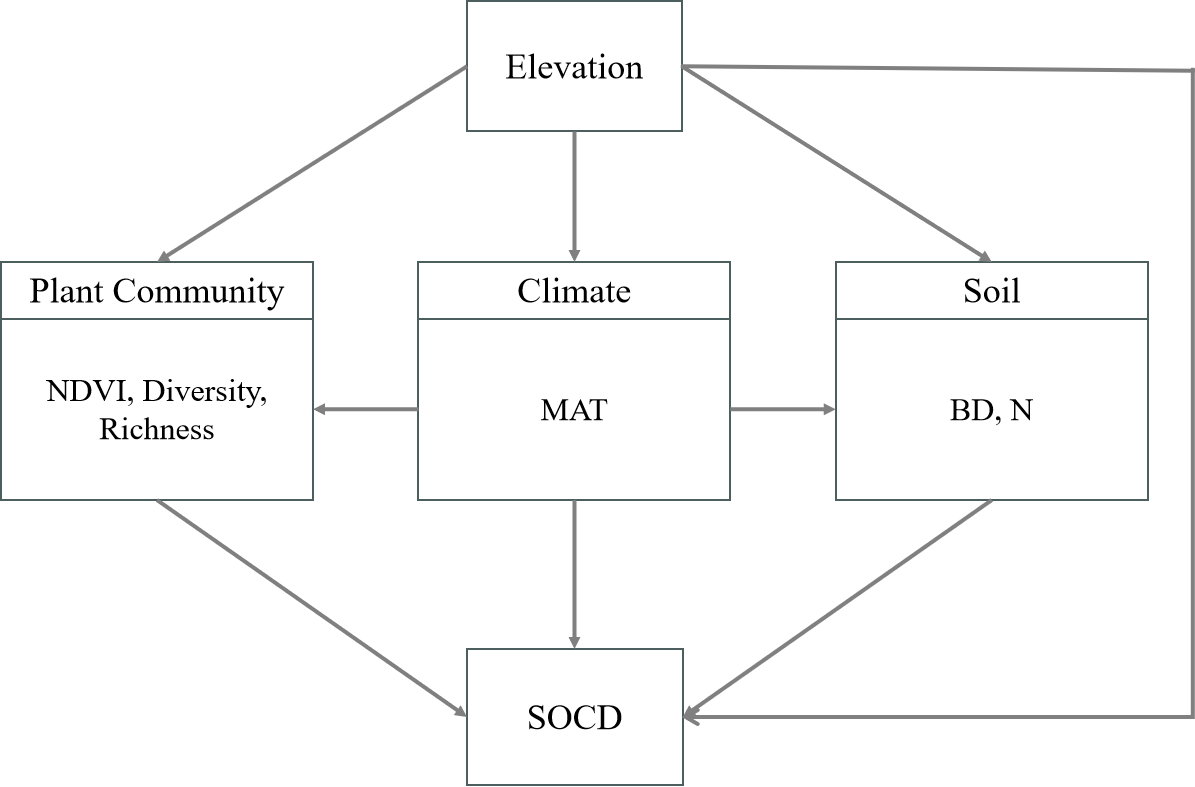

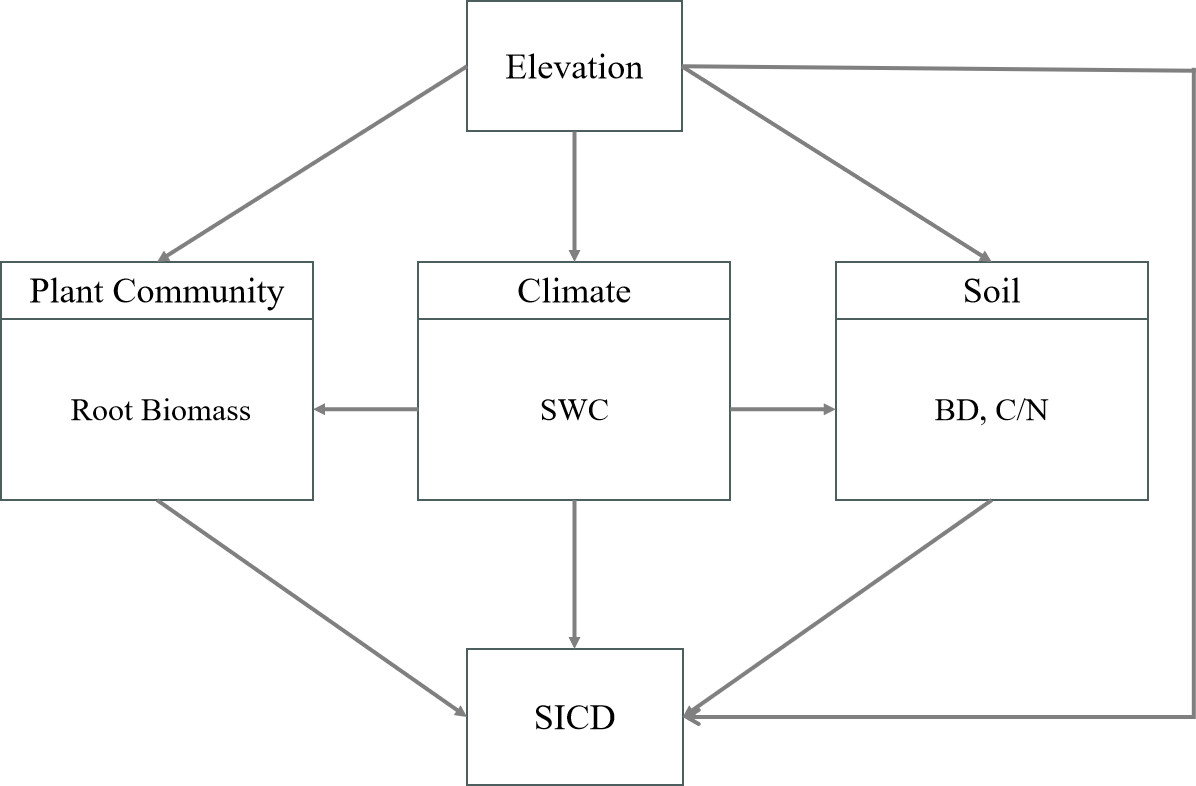


1. b)

Fig. S1 The initial SEM models of SOCD a) and SICD b)
